# Supplementary material for: Characterization of Bacterial Diversity in Aguamiel and Two Types of Pulque from the Zacatlán Region, México
Source: MDPI journal article supplement (doi:10.3390/fermentation9060564), 2023-06-15
Supplement: s1 [file s1]

## Supplementary Materials

**Table S1.** Bacterial genera reported over time in aguamiel and pulque.

| <i>Phylum</i>         | <i>Genera</i>             | <i>Matrix</i>               | <i>Technique</i>    | <i>Reference</i>       |
|-----------------------|---------------------------|-----------------------------|---------------------|------------------------|
| <i>Actinobacteria</i> | <i>Adlercreutzia</i>      | Tailstock                   | Illumina Sequencing | Rocha et al., 2020     |
|                       | <i>Cellulosimicrobium</i> | Aguamiel, Tailstock         | Illumina Sequencing | Rocha et al., 2020     |
|                       | <i>Corynebacterium</i>    | Aguamiel, Tailstock         | Illumina Sequencing | Rocha et al., 2020     |
|                       | <i>Euzebia</i>            | Pulque                      | Illumina Sequencing | Rocha et al., 2020     |
|                       | <i>Luteimicrobium</i>     | Tailstock                   | Illumina Sequencing | Rocha et al., 2020     |
| <i>Bacteroidetes</i>  | <i>Chryseobacterium</i>   | Pulque                      | 16S rRNA analysis   | Escalante et al., 2008 |
|                       | <i>Dysgonomonas</i>       | Pulque                      | Illumina Sequencing | Rocha et al., 2020     |
|                       | <i>Flavobacterium</i>     | Pulque                      | 16S rRNA analysis   | Escalante et al., 2004 |
|                       | <i>Prevotella</i>         | Aguamiel                    | Illumina Sequencing | Rocha et al., 2020     |
| <i>Chloroflexi</i>    | <i>Ardenscatena</i>       | Tailstock                   | Illumina Sequencing | Rocha et al., 2020     |
| <i>Cyanobacteria</i>  | <i>Halomicronema</i>      | Aguamiel, Tailstock, Pulque | Illumina Sequencing | Rocha et al., 2020     |
|                       | <i>Synechococcus</i>      | Aguamiel, Pulque            | Illumina Sequencing | Rocha et al., 2020     |
| <i>Firmicutes</i>     | <i>Bacillus</i>           | Pulque, Aguamiel            | 16S rRNA analysis   | Escalante et al., 2008 |
|                       | <i>Clostridium</i>        | Aguamiel, Tailstock         | Illumina Sequencing | Rocha et al., 2020     |
|                       | <i>Enterococcus</i>       | Aguamiel                    | DGGE analysis       | Villareal et al., 2019 |
|                       | <i>Lactobacillus</i>      | Pulque                      | 16S rRNA analysis   | Escalante et al., 2004 |
|                       | <i>Lactococcus</i>        | Aguamiel, Tailstock, Pulque | Illumina Sequencing | Rocha et al., 2020     |
|                       | <i>Pediococcus</i>        | Aguamiel                    | DGGE analysis       | Villareal et al., 2019 |
|                       | <i>Streptococcus</i>      | Aguamiel                    | 16S rRNA analysis   | Escalante et al., 2008 |
|                       | <i>Weissella</i>          | Aguamiel, Tailstock, Pulque | Illumina Sequencing | Rocha et al., 2020     |
| <i>Proteobacteria</i> | <i>Acetobacter</i>        | Aguamiel, Tailstock, Pulque | Illumina Sequencing | Rocha et al., 2020     |
|                       | <i>Acinetobacter</i>      | Aguamiel                    | 16S rRNA analysis   | Escalante et al., 2008 |
|                       | <i>Enterobacter</i>       | Aguamiel, Pulque            | 16S rRNA            | Enríquez et al., 2019  |
|                       | <i>Erwinia</i>            | Aguamiel                    | 16S rRNA            | Enríquez et al., 2019  |
|                       | <i>Klebsiella</i>         | Tailstock, Pulque           | Illumina Sequencing | Rocha et al., 2020     |
|                       | <i>Kluyvera</i>           | Aguamiel, Pulque            | 16S rRNA analysis   | Escalante et al., 2008 |
|                       | <i>Pseudomonas</i>        | Tailstock                   | Illumina Sequencing | Rocha et al., 2020     |
|                       | <i>Zymomonas</i>          | Pulque                      | 16S rRNA amplicons  | Escalante et al., 2008 |

**Table S2.** Relative abundance of 16S amplicons assigned to bacterial groups found in aguamiel, seedsamples, artisanal and commercial pulque.

| Family              | Genus                 | Aguamiel     | Seed         | Artisanal pulque | Commercial pulque |
|---------------------|-----------------------|--------------|--------------|------------------|-------------------|
| Bacteroidales S24-7 | uncultured            | 0.05 ± 0.02  | 0.05 ± 0.1   | 0.05 ± 0.02      | 0.05 ± 0.01       |
| Lactobacillaceae    | <i>Lactobacillus</i>  | 5.07 ± 1.37  | 83.37 ± 2.95 | 63.61 ± 6.01     | 54.43 ± 6.97      |
| Leuconostocaceae    | <i>Leuconostoc</i>    | 49.36 ± 2.57 | 5.98 ± 0.92  | 14.06 ± 2.80     | 20.85 ± 4.43      |
| Streptococcaceae    | <i>Weissella</i>      | 0.00 ± 0.00  | 0.08 ± 0.07  | 0.15 ± 0.02      | 0.14 ± 0.03       |
|                     | <i>Streptococcus</i>  | 22.33 ± 0.99 | 4.62 ± 1.99  | 14.03 ± 1.63     | 20.52 ± 3.01      |
|                     | uncultured            | 0.01 ± 0.01  | 0.03 ± 0.01  | 0.06 ± 0.01      | 0.05 ± 0.00       |
| Lachnospiraceae     | NK4A136 group         | 0.01 ± 0.01  | 0.01 ± 0.00  | 0.01 ± 0.00      | 0.01 ± 0.00       |
|                     | uncultured            | 0.01 ± 0.01  | 0.03 ± 0.00  | 0.06 ± 0.00      | 0.05 ± 0.01       |
| Erysipelotrichaceae | <i>Faecalibaculum</i> | 0.01 ± 0.01  | 0.01 ± 0.00  | 0.01 ± 0.00      | 0.01 ± 0.01       |
| Acetobacteraceae    | <i>Acetobacter</i>    | 0.02 ± 0.01  | 0.83 ± 0.16  | 2.95 ± 2.07      | 0.40 ± 0.05       |
|                     | Other                 | 0.00 ± 0.00  | 0.02 ± 0.01  | 0.08 ± 0.03      | 0.02 ± 0.01       |
| Sphingomonadaceae   | <i>Zymomonas</i>      | 0.00 ± 0.00  | 1.11 ± 0.95  | 2.81 ± 0.24      | 2.39 ± 0.86       |
| Enterobacteriaceae  | <i>Enterobacter</i>   | 0.04 ± 0.00  | 0.02 ± 0.01  | 0.01 ± 0.01      | 0.02 ± 0.01       |
|                     | <i>Hafnia</i>         | 0.07 ± 0.00  | 0.01 ± 0.00  | 0.01 ± 0.00      | 0.01 ± 0.01       |
| Moraxellaceae       | <i>Acinetobacter</i>  | 22.83 ± 2.27 | 3.75 ± 1.38  | 2.05 ± 1.08      | 1.02 ± 0.16       |
| Total               |                       | 99.81        | 99.90        | 99.90            | 99.92             |
